# Supplementary material for: Do We Need Surveillance Urethro-Cystoscopy in Patients with Neurogenic Lower Urinary Tract Dysfunction?
Source: PLOS journal article supplement (doi:10.1371/journal.pone.0140970), 2015-10-29
Supplement: S2 (10.1371/journal.pone.0140970.s002) [file journal.pone.0140970.s002]

STROBE Statement—Checklist of items that should be included in reports of *cross-sectional studies*

|                              | Item No | Recommendation                                                                                                                                                                                               |        |
|------------------------------|---------|--------------------------------------------------------------------------------------------------------------------------------------------------------------------------------------------------------------|--------|
| <b>Title and abstract</b>    | 1       | (a) Indicate the study's design with a commonly used term in the title or the abstract<br>(b) Provide in the abstract an informative and balanced summary of what was done and what was found                | ✓<br>✓ |
| <b>Introduction</b>          |         |                                                                                                                                                                                                              |        |
| Background/rationale         | 2       | Explain the scientific background and rationale for the investigation being reported                                                                                                                         | ✓      |
| Objectives                   | 3       | State specific objectives, including any prespecified hypotheses                                                                                                                                             | ✓      |
| <b>Methods</b>               |         |                                                                                                                                                                                                              |        |
| Study design                 | 4       | Present key elements of study design early in the paper                                                                                                                                                      | ✓      |
| Setting                      | 5       | Describe the setting, locations, and relevant dates, including periods of recruitment, exposure, follow-up, and data collection                                                                              | ✓      |
| Participants                 | 6       | (a) Give the eligibility criteria, and the sources and methods of selection of participants                                                                                                                  | ✓      |
| Variables                    | 7       | Clearly define all outcomes, exposures, predictors, potential confounders, and effect modifiers. Give diagnostic criteria, if applicable                                                                     | ✓      |
| Data sources/<br>measurement | 8*      | For each variable of interest, give sources of data and details of methods of assessment (measurement). Describe comparability of assessment methods if there is more than one group                         | ✓      |
| Bias                         | 9       | Describe any efforts to address potential sources of bias                                                                                                                                                    | ✓      |
| Study size                   | 10      | Explain how the study size was arrived at                                                                                                                                                                    | ✓      |
| Quantitative variables       | 11      | Explain how quantitative variables were handled in the analyses. If applicable, describe which groupings were chosen and why                                                                                 | ✓      |
| Statistical methods          | 12      | (a) Describe all statistical methods, including those used to control for confounding                                                                                                                        | ✓      |
|                              |         | (b) Describe any methods used to examine subgroups and interactions                                                                                                                                          | ✓      |
|                              |         | (c) Explain how missing data were addressed                                                                                                                                                                  | ✓      |
|                              |         | (d) If applicable, describe analytical methods taking account of sampling strategy                                                                                                                           | ✓      |
|                              |         | (e) Describe any sensitivity analyses                                                                                                                                                                        | ✓      |
| <b>Results</b>               |         |                                                                                                                                                                                                              |        |
| Participants                 | 13*     | (a) Report numbers of individuals at each stage of study—eg numbers potentially eligible, examined for eligibility, confirmed eligible, included in the study, completing follow-up, and analysed            | ✓      |
|                              |         | (b) Give reasons for non-participation at each stage                                                                                                                                                         | ✓      |
|                              |         | (c) Consider use of a flow diagram                                                                                                                                                                           | ✓      |
| Descriptive data             | 14*     | (a) Give characteristics of study participants (eg demographic, clinical, social) and information on exposures and potential confounders                                                                     | ✓      |
|                              |         | (b) Indicate number of participants with missing data for each variable of interest                                                                                                                          | ✓      |
| Outcome data                 | 15*     | Report numbers of outcome events or summary measures                                                                                                                                                         | ✓      |
| Main results                 | 16      | (a) Give unadjusted estimates and, if applicable, confounder-adjusted estimates and their precision (eg, 95% confidence interval). Make clear which confounders were adjusted for and why they were included | ✓      |
|                              |         | (b) Report category boundaries when continuous variables were categorized                                                                                                                                    | ✓      |
|                              |         | (c) If relevant, consider translating estimates of relative risk into absolute risk for a meaningful time period                                                                                             | ✓      |
| Other analyses               | 17      | Report other analyses done—eg analyses of subgroups and interactions, and sensitivity analyses                                                                                                               | ✓      |
